# Supplementary material for: Controlling the dispersion of ceria using nanoconfinement: application to CeO2/SBA-15 catalysts for NH3-SCR
Source: Royal Society of Chemistry journal article supplement (doi:10.1039/d1ma00658d), 2021-01-01
Supplement: d1ma00658d1.pdf [file d1ma00658d1.pdf]

*Electronic Supplementary Information for:*

**Controlling the Dispersion of Ceria Using Nanoconfinement: Application  
to CeO<sub>2</sub>/SBA-15 Catalysts for NH<sub>3</sub>-SCR**

Jun Shen and Christian Hess\*

Eduard-Zintl-Institut für Anorganische und Physikalische Chemie, Technical University  
of Darmstadt, Alarich-Weiss-Str. 8, 64287 Darmstadt, Germany. Email: [jun.shen@tu-darmstadt.de](mailto:jun.shen@tu-darmstadt.de); [christian.hess@tu-darmstadt.de](mailto:christian.hess@tu-darmstadt.de)

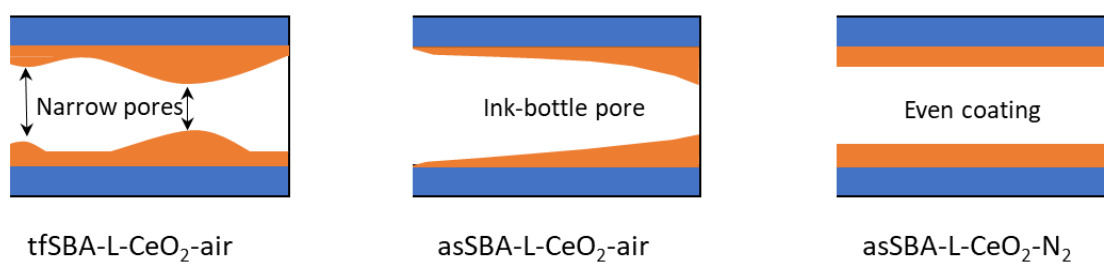

**Figure S1** Schematic diagrams of pore shapes of the three tested samples.

**(a)**

(i) Water-acid azeotrope formation:

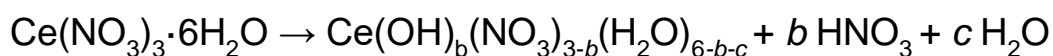

(ii)  $\text{NO}_3^-$  thermal decomposition:

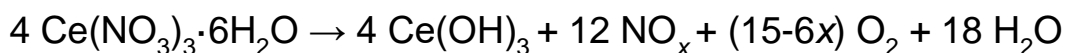

(iii) Cerium hydroxide condensation:

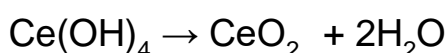

**(b)**

(i) Dehydration:

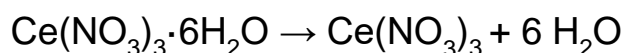

(ii) Decomposition to  $\text{CeO}_2$ :

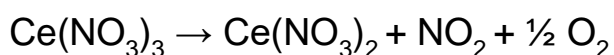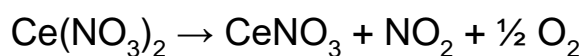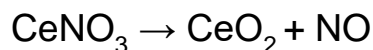

**Figure S2** According to Cochran et al.((a)),<sup>1</sup> the weight loss can be subdivided into three stages: (i) prior to decomposition, the salt melts and releases loosely bound water (<100 °C), or evaporates as aqueous acid azeotrope at a boiling point of about 120 °C; (ii) at higher temperature (>266 °C), residual nitrate thermally decomposes into  $\text{NO}_x$  gas and forms a solid metal hydroxide product; (iii) the resulting cerium hydroxide condenses to form ceria. Kang et al. have proposed a more detailed mechanism for the decomposition of  $\text{Ce}(\text{NO}_3)_3$  ((b)) according to which  $\text{Ce}(\text{NO}_3)_3$  transforms first to  $\text{Ce}(\text{NO}_3)_2$  at about 245 °C, then to  $\text{Ce}(\text{NO}_3)$  at about 270 °C, and finally to  $\text{CeO}_2$  at about 295 °C.<sup>2</sup>

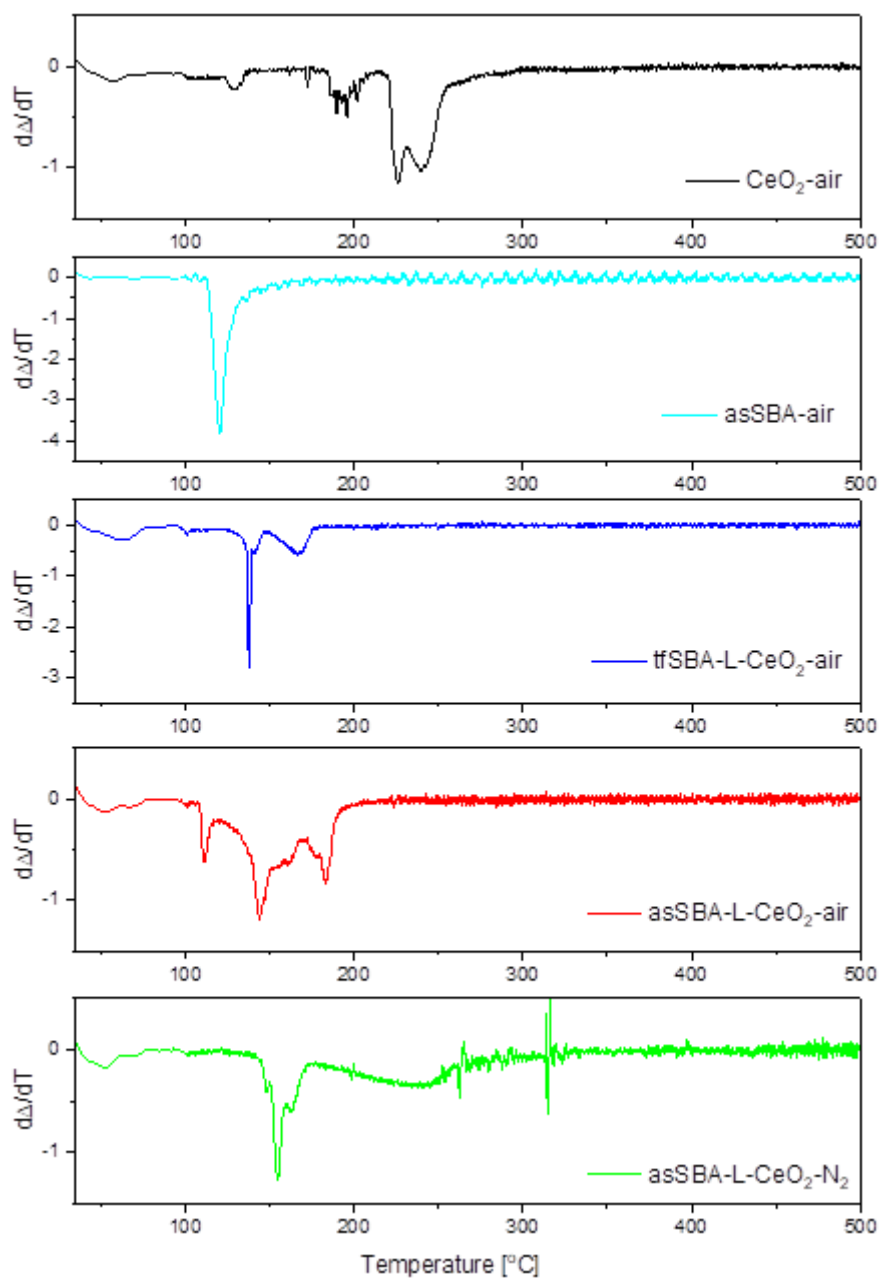

**Figure S3** DTG profiles of pure cerium nitrate, asSBA-15, and mixtures of SBA-15 and cerium nitrate during heating to 500 °C in air or inert  $\text{N}_2$  (heating rate: 1.5 °C/min).

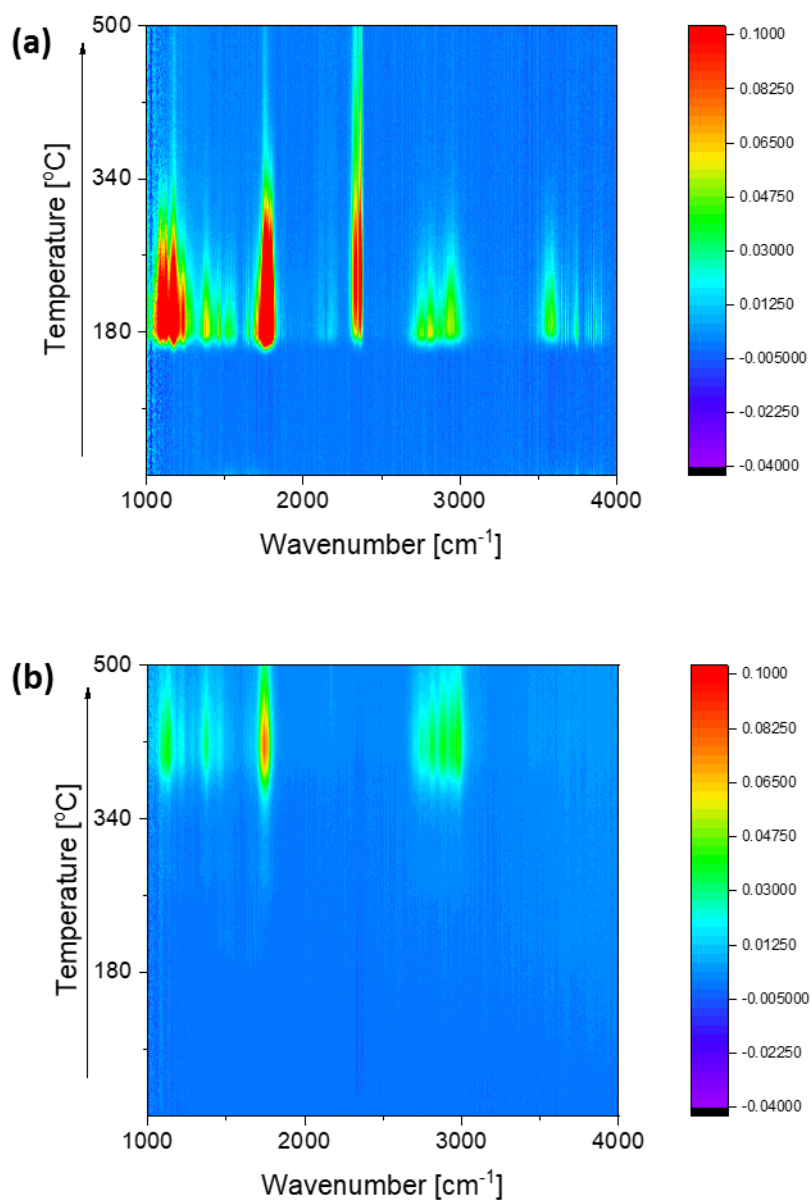

**Figure S4** *In situ* detection of exhaust during calcination of samples (a) asSBA15-air, (b) asSBA15-N<sub>2</sub>.

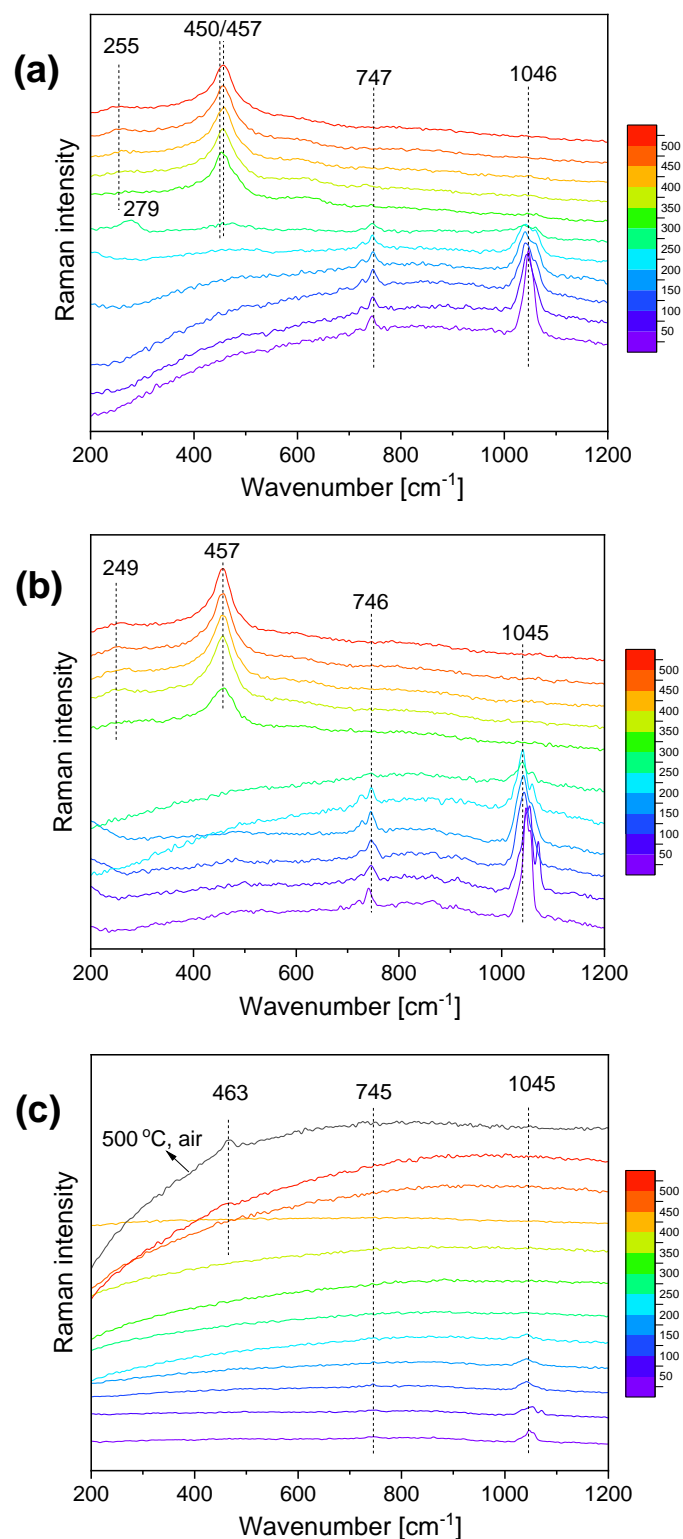

**Figure S5** *In situ* Raman spectra (514.5 nm) during the calcination of (a) tfSBA-L-CeO<sub>2</sub>-air, (b) asSBA-L-CeO<sub>2</sub>-air, and (c) asSBA-L-CeO<sub>2</sub>-N<sub>2</sub>, following the protocol given in Fig. 1a. Spectra are offset for clarity. The feature at about 250 cm<sup>-1</sup> has been shown to originate from the longitudinal stretching mode of surface oxygen against cerium ions (Ce-O) as well as a contribution of the 2TA phonon,<sup>3,4</sup> whereas the additional feature at about 279 cm<sup>-1</sup> is tentatively assigned to a nitro species formed during the transformation from cerium nitrate to crystalline ceria.<sup>5</sup>

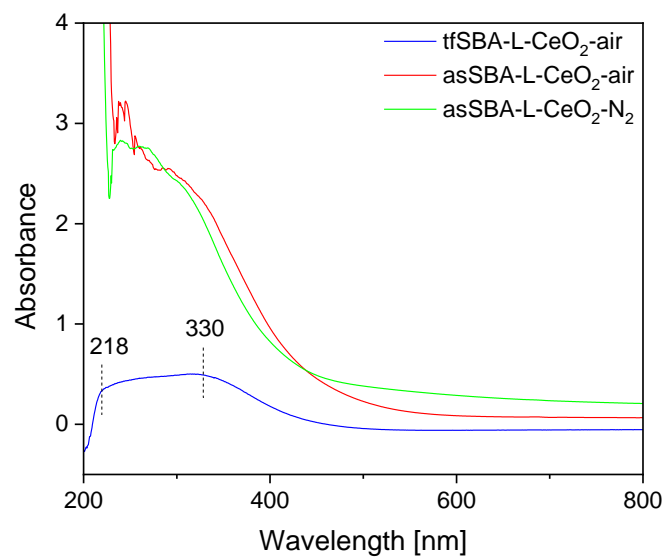

**Figure S6** DR UV-vis spectra of the samples tfSBA-L-CeO<sub>2</sub>-air, asSBA-L-CeO<sub>2</sub>-air, and asSBA-L-CeO<sub>2</sub>-N<sub>2</sub>, recorded at room temperature after cooling from high temperature calcination in synthetic air.

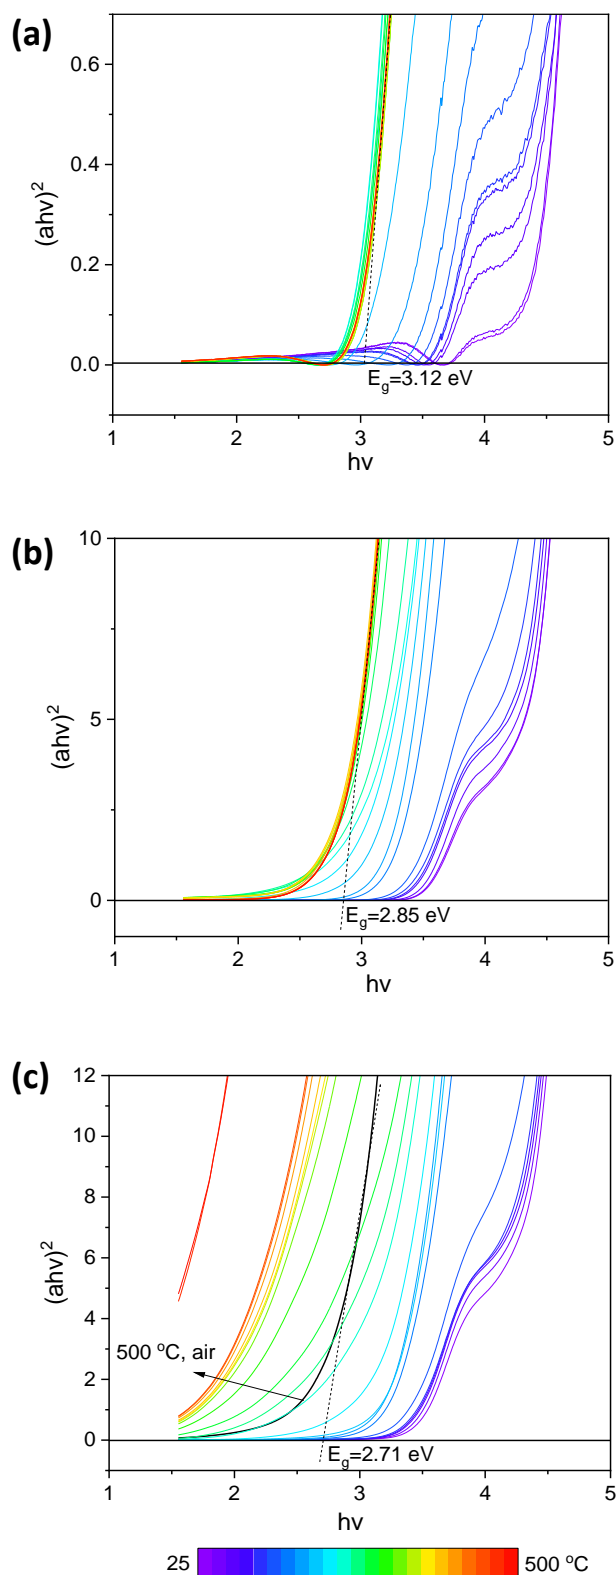

**Figure S7** Calculation of band gap energies according to the *in situ* DR UV-vis spectra by applying Tauc's method. (a) fSBA-L-CeO<sub>2</sub>-air, (b) asSBA-L-CeO<sub>2</sub>-air, and (c) asSBA-L-CeO<sub>2</sub>-N<sub>2</sub>. In (c) the black curve represents the sample calcined in N<sub>2</sub>, followed by calcination in air at 500 °C for 2 hours.



**Table S1** Assignment of the IR features observed by *in situ* DRIFT spectroscopy.

| Wavenumber, cm <sup>-1</sup> | tfSBA-CeO <sub>2</sub> -air            | asSBA-CeO <sub>2</sub> -air | asSBA-CeO <sub>2</sub> -N <sub>2</sub> | Ref. |
|------------------------------|----------------------------------------|-----------------------------|----------------------------------------|------|
| 1225-1237                    |                                        | Hydrogen carbonates         | Hydrogen carbonates                    | 6    |
| 1253                         | Chelate NO <sub>2</sub> <sup>-</sup>   |                             |                                        | 7    |
| 1303                         | Monodentate nitrates                   |                             |                                        | 8    |
| 1345-1357                    | Free nitrate ions                      |                             | Free nitrate ions                      | 8    |
| 1458                         |                                        |                             | C-H deformation                        | 9    |
| 1539-1543                    | Bidentate nitrates                     | Bidentate nitrates          |                                        | 10   |
| 1613                         | Bridging nitrates                      |                             |                                        | 10   |
| 1625-1636                    | Adsorbed NO <sub>2</sub>               | Adsorbed NO <sub>2</sub>    | Adsorbed NO <sub>2</sub>               | 8    |
| 1663                         | Adsorbed N <sub>2</sub> O <sub>4</sub> |                             |                                        | 8    |
| 1729-1732                    |                                        | C=O                         | C=O                                    | 7    |
| 1764-1767                    | Adsorbed NO                            | Adsorbed NO                 | Adsorbed NO                            | 7    |
| 1849-1981                    | Silica framework                       | Silica framework            | Silica framework                       | 8    |
| 2290/2341                    |                                        | Adsorbed CO <sub>2</sub>    |                                        | 7    |
| 2356-2360                    | CO <sub>2</sub>                        | CO <sub>2</sub>             | CO <sub>2</sub>                        | 11   |
| 2484-2491                    | C-H                                    | C-H                         | C-H                                    | 12   |
| 2809                         | C-H <sub>2</sub>                       |                             |                                        | 13   |
| 2867/2933/2976               |                                        | C-H                         | C-H                                    | 11   |
| 2941                         | CH <sub>2</sub>                        |                             |                                        | 9    |
| 3176                         | -OH                                    |                             |                                        | 14   |
| 3266                         | -OH                                    |                             |                                        | 13   |
| 3200-3500                    | -OH                                    |                             |                                        | 13   |
| 3700                         |                                        |                             | Ce-OH                                  | 15   |
| 3740                         | Si-OH                                  | Si-OH                       |                                        | 13   |

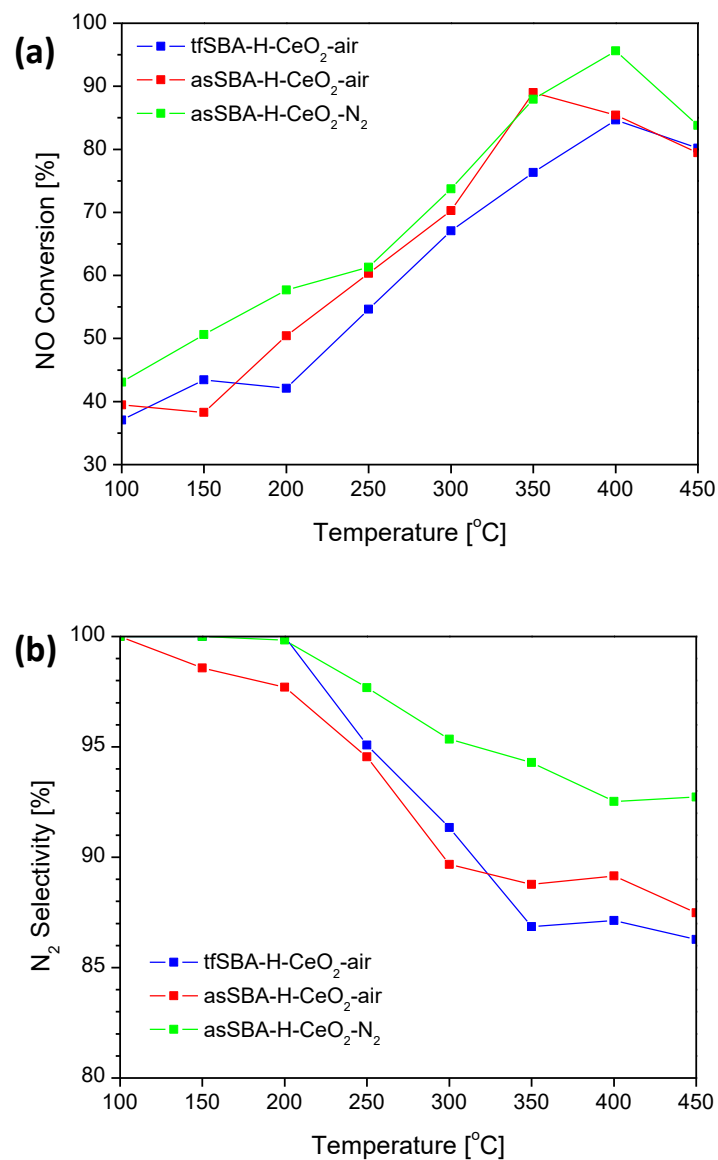

**Figure S8** (a) NO conversion and (b) N<sub>2</sub> selectivity of the indicated samples in NH<sub>3</sub>-SCR of NO, using a feed gas consisting of 500 ppm NH<sub>3</sub>, 500 ppm NO, and 5% O<sub>2</sub> (balanced with N<sub>2</sub>) and a total gas flow of 50 ml·min<sup>-1</sup> (GHSV=30000 h<sup>-1</sup>).

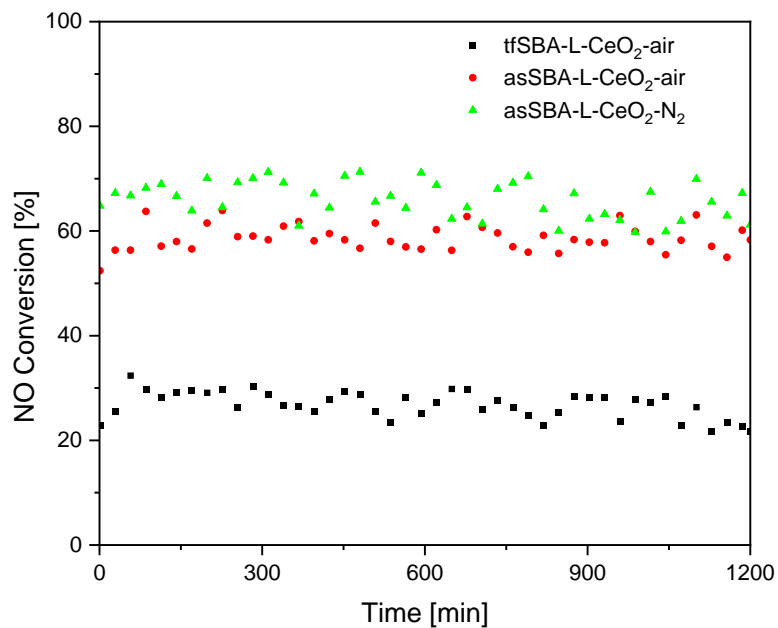

**Figure S9** Stability of the indicated samples in NH<sub>3</sub>-SCR of NO at 300 °C, using a feed gas consisting of 500 ppm NH<sub>3</sub>, 500 ppm NO, and 5% O<sub>2</sub> (balanced with N<sub>2</sub>) and a total gas flow of 50 ml·min<sup>-1</sup> (GHSV=30000 h<sup>-1</sup>).

**Table S2** Catalytic performance of cerium-based deNO<sub>x</sub> catalysts synthesized by different methods.

| Catalyst                               | Preparation method       | Reaction conditions                                                                        | NO <sub>x</sub> conversion (temperature range) | GHSV or GWSV                                                       | Source    |
|----------------------------------------|--------------------------|--------------------------------------------------------------------------------------------|------------------------------------------------|--------------------------------------------------------------------|-----------|
| CeO <sub>2</sub>                       | precipitation method     | NO = 600 ppm, NH <sub>3</sub> = 600, ppm, O <sub>2</sub> = 5%                              | 45-60% (225-350 °C)                            | 108000 h <sup>-1</sup>                                             | 16        |
| CeO <sub>2</sub>                       | hydrothermal method      | NH <sub>3</sub> = NO = 500 ppm, O <sub>2</sub> = 3%                                        | 50% (300 °C)                                   | 120000 ml g <sup>-1</sup> h <sup>-1</sup>                          | 17        |
| CeO <sub>2</sub>                       | thermal decomposition    | NO = 736 mg/m <sup>3</sup> , NH <sub>3</sub> = 417 mg/m <sup>3</sup> , O <sub>2</sub> = 5% | 60-65% (300-400 °C)                            | 108000 h <sup>-1</sup>                                             | 18        |
| CeO <sub>2</sub>                       | impregnation             | NH <sub>3</sub> = NO = 500 ppm, O <sub>2</sub> = 5%                                        | 15-20 % (350-450 °C)                           | 120000 ml g <sup>-1</sup> h <sup>-1</sup>                          | 19        |
| CeO <sub>2</sub>                       | thermal decomposition    | NH <sub>3</sub> = NO = 600 ppm, O <sub>2</sub> = 5%                                        | 40-50% (250-325 °C)                            | 108000 h <sup>-1</sup>                                             | 20        |
| CeO <sub>2</sub>                       | one-pot                  | NH <sub>3</sub> = NO = 500 ppm, O <sub>2</sub> = 3%                                        | 50-60% (300-400 °C)                            | 45000 h <sup>-1</sup>                                              | 21        |
| CeO <sub>2</sub>                       | spread self-combustion   | NH <sub>3</sub> = NO = 500 ppm, O <sub>2</sub> = 5%                                        | 15 % (300-500 °C)                              | 200000 ml g <sup>-1</sup> h <sup>-1</sup>                          | 22        |
| CeO <sub>2</sub> /SiO <sub>2</sub>     | wet impregnation         | NH <sub>3</sub> = NO = 500 ppm, O <sub>2</sub> = 5%                                        | 70-80% (275-325 °C)                            | 48000 ml g <sup>-1</sup> h <sup>-1</sup>                           | 23        |
| CeO <sub>2</sub> /SBA-15               | wet impregnation         | NH <sub>3</sub> = 1100 ppm, NO = 1000 ppm, O <sub>2</sub> = 5%                             | 60-70% (200-300 °C)                            | 10000 h <sup>-1</sup>                                              | 24        |
| tfSBA-CeO <sub>2</sub> -air            | solid-state impregnation | NH <sub>3</sub> = NO = 500 ppm, O <sub>2</sub> = 5%                                        | 30% (300-400 °C)                               | 30000 h <sup>-1</sup> (150000 ml g <sup>-1</sup> h <sup>-1</sup> ) | This work |
| asSBA-CeO <sub>2</sub> -air            | solid-state impregnation | NH <sub>3</sub> = NO = 500 ppm, O <sub>2</sub> = 5%                                        | 50-60% (250-400 °C)                            | 30000 h <sup>-1</sup> (150000 ml g <sup>-1</sup> h <sup>-1</sup> ) | This work |
| asSBA-CeO <sub>2</sub> -N <sub>2</sub> | solid-state impregnation | NH <sub>3</sub> = NO = 500 ppm, O <sub>2</sub> = 5%                                        | 55-65% (200-450 °C)                            | 30000 h <sup>-1</sup> (150000 ml g <sup>-1</sup> h <sup>-1</sup> ) | This work |

## References

- 1 E. A. Cochran, K. N. Woods, D. W. Johnson, C. J. Page and S. W. Boettcher, *J. Mater. Chem. A*, 2019, **7**, 24124-24149.
- 2 W. Kang, D. O. Ozgur and A. Varma, *ACS Appl. Nano Mater.*, 2018, **1**, 675-685.
- 3 C. Schilling, A. Hofmann, C. Hess and M. V. Ganduglia-Pirovano, *J. Phys. Chem. C*, 2017, **121**, 20834-20849.
- 4 A. Filtschew, D. Stranz and C. Hess, *Phys. Chem. Chem. Phys.*, 2013, **15**, 9066-9069.
- 5 C. Hess and J. H. Lunsford, *J. Phys. Chem. B*, 2002, **106**, 6358-6360.
- 6 S. M. Lee, Y. H. Lee, D. H. Moon, J. Y. Ahn, D. D. Nguyen, S. W. Chang and S. S. Kim, *Ind. Eng. Chem. Res.*, 2019, **58**, 8656-8662.
- 7 L. Y. Wang, Z. Q. Wang, X. X. Cheng, M. Z. Zhang, Y. K. Qin and C. Y. Ma, *RSC Adv.*, 2017, **7**, 7695-7710.
- 8 R. Wu, N. Q. Zhang, L. C. Li, H. He, L. Y. Song and W. G. Qiu, *Catalysts*, 2018, **8**.
- 9 D. Parimi, V. Sundararajan, O. Sadak, S. Gunasekaran, S. S. Mohideen and A. Sundaramurthy, *ACS Omega*, 2019, **4**, 104-113.
- 10 C. X. Wang, D. Z. Ren, J. C. Du, Q. G. Qin, A. M. Zhang, L. Chen, H. Cui, J. L. Chen and Y. K. Zhao, *Catalysts*, 2020, **10**.
- 11 H. Song, B. Mirkelamoglu and U. S. Ozkan, *Appl. Catal. A*, 2010, **382**, 58-64.
- 12 N. Bourenane, Y. Hamlaoui, C. Remazeilles and F. Pedraza, *Materials and Corrosion-Werkstoffe Und Korrosion*, 2019, **70**, 110-119.
- 13 C. Vittoni, G. Gatti, G. Paul, E. Mangano, S. Brandani, C. Bisio and L. Marchese, *ChemistryOpen*, 2019, **8**, 719-727.
- 14 B. Xu, Y. W. Liu, Y. Li, L. L. Wang, N. N. Li, M. Fu, P. Wang and Q. Wang, *New. J. Chem.*, 2018, **42**, 11796-11803.
- 15 Z. L. Wu, Y. Q. Cheng, F. Tao, L. Daemen, G. S. Foo, L. Nguyen, X. Y. Zhang, A. Beste and A. J. Ramirez-Cuesta, *J. Am. Chem. Soc.*, 2017, **139**, 9721-9727.
- 16 F. D. Liu, W. P. Shan, X. Y. Shi, C. B. Zhang and H. He, *Chin. J. Catal.*, 2011, **32**, 1113-1128.
- 17 X. L. Hu, J. X. Chen, W. Y. Qu, R. Liu, D. R. Xu, Z. Ma and X. F. Tang, *Environ. Sci. Technol.*, 2021, **55**, 5435-5441.  
2018, **353**, 930-939.
- 18 H. Lv, X. Hua, W. Xie, Q. Hu, J. Wu and R. Guo, *J. Rare Earths*, 2018, **36**, 708-714.
- 19 H. L. Zhang, L. Ding, H. M. Long, J. X. Li, W. Tan, J. W. Ji, J. F. Sun, C. J. Tang and L. Dong, *J. Rare Earths*, 2020, **38**, 883-890.
- 20 X. Sun, R.-T. Guo, S.-W. Liu, J. Liu, W.-G. Pan, X. Shi, H. Qin, Z.-Y. Wang, Z.-Z. Qiu and X.-Y. Liu, *Appl. Surf. Sci.*, 2018, **462**, 187-193.
- 21 Y. Q. Zeng, Y. N. Wang, S. L. Zhang, Q. Zhong, W. L. Rong and X. H. Li, *J. Colloid Interface Sci.*, 2018, **524**, 8-15.
- 22 Z.-B. Xiong, Z.-Z. Li, C.-X. Li, W. Wang, W. Lu, Y.-P. Du and S.-I. Tian, *Appl. Surf. Sci.*, 2021, **536**, 147719.
- 23 W. Tan, A. N. Liu, S. H. Xie, Y. Yan, T. E. Shaw, Y. Pu, K. Guo, L. L. Li, S. H. Yu, F. Gao, F. D. Liu and L. Dong, *Environ. Sci. Technol.*, 2021, **55**, 4017-4026.
- 24 X. Q. Ran, M. H. Li, K. Wang, X. Y. Qian, J. W. Fan, Y. Sun, W. Luo, W. Teng, W. X. Zhang and J. P. Yang, *ACS Appl. Mater. Interfaces*, 2019, **11**, 19242-19251.
